# Supplementary material for: Models To Predict The Short-Term Survival of Acute-On-Chronic Liver Failure Patients Following Liver Transplantation
Source: Research Square preprint supplement (doi:10.21203/rs.3.rs-1066854/v1), 2021-11-18
Supplement: Supplementary file 1 [file 418298021623957c2769bf82.docx]

**Supplement Table 1: Formulas for scores to represent acute-on-chronic liver failure (ACLF)**

| **Scores** | **Formulas** | | | | | | |
| --- | --- | --- | --- | --- | --- | --- | --- |
| MELD score | 9.1×ln[creatinine(mg/dL)]+3.8×ln[bilirubin(mg/dL)]+11.2×ln(INR)+6.4×(etiology:0 if cholestatic or alcoholic, 1 otherwise). | | | | | | |
| ABIC score | (age × 0.1) + (bilirubin(mg/dL)× 0.08) + (creatine(mg/dL) × 0.3)+(INR × 0.8) | | | | | | |
| CLIF-SOFA | 0 | 1 | 2 | 3 | | 4 | |
| Liver(bilirubin, mg/dL) | ＜1.2 | ≥1.2 to ＜2.0 | ≥2.0 to ＜6.0 | ≥6.0 to ＜12.0 | | ≥12.0 | |
| Renal(creatine, mg/dL) | ＜1.2 | ≥1.2 to ＜2.0 | ≥2.0 to ＜3.5 | ≥3.5 to ＜5.0 or use of RRT | | ≥5.0 | |
| CNS(HE grade) | No HE | Ⅰ | Ⅱ | Ⅲ | | Ⅳ | |
| Coagulation(INR) | ＜1.1 | ≥1.1 to ＜1.25 | ≥1.25 to ＜1.5 | ≥1.5 to ＜2.5 | | ≥2.5 to platelet＜2*10^9/L | |
| Cardiovascular(hypotension) | MAP≥20 | MAP＜70 | Dopamine≤5 or dobutamine(any dose) or terlipressin | Dopamine＞5 or epi≤0.1 or norepi≤0.1 | | Dopamine＞15 or epi＞0.1 or norepi＞0.1 | |
| Respiration |  | | | | | | |
| PaO2/FiO2 | ＞400 | ＞300 to ≤400 | ＞200 to ≤300 | ＞100 to ≤200 | | | ≤100 |
| Or SpO2/FiO2 | ＞512 | ＞357 to ≤512 | ＞214 and ≤357 | ＞89 to ≤214 | | | ≤89 |
| CLIF-C OF |  | | | | | | |
| Liver(bilirubin, mg/dL) | 1 | 2 | 3 | |  | | |
| Renal(creatine, mg/dL) | ＜6 | ≥6 to ＜12 | ≥12 | |  | | |
| CNS(HE grade) | 0 | 1-2 | 3-4 | |  | | |
| Coagulation(INR) | ＜2.0 | ≥2.0 to ＜3.5 | ≥3.5 or ＜RRT | |  | | |
| Cardiovascular(hypotension) | MAP≥70 | MAP＜70 | Vasopressors | |  | | |
| Respiration |  |  |  | |  | | |
| PaO2/FiO2 | ＞300 | ≤300 and ＞200 | ≤200 | |  | | |
| Or SpO2/FiO2 | ＞357 | ＞214 to ≤357 | ≤214 | |  | | |
| CLIF-ACLFs | 10×[0.33×CLIF-C OFs+0.04×Age+0.63×ln(WBC count) ×2] | | | | | | |

Abbreviations:MELD: Model for end-stage liver disease; ABIC: age-bilirubin-international normalized ratio-creatinine; CLIF-SOFA: Chronic liver failure-Sequential organ failure assessment; CLIF-C OF: Chronic liver failure consortium Organ Failure score; INR: International normalized ratio; RRT: Renal replacement therapy; HE: Hepatic encephalopathy; MAP: Mean arterial pressure; PaO2: Partial pressure of arterial oxygen; FiO2: Fraction of inspired oxygen; SPO2: Pulse oximetric saturation.
